# Supplementary material for: Psychosocial and Physiological Health Outcomes of Green Exercise in Children and Adolescents—A Systematic Review
Source: MDPI journal article supplement (doi:10.3390/ijerph16214266), 2019-11-02
Supplement: s1 [file s1]

## Additional file 1: Test statistics and descriptives

| Author/<br>year           | Results                                                                                                                                                                                                                                                                                                                                                                                                                                                                                                                                                                                                                                                                                                                                                                                                                                                                                                                                                               |                             |                           |                             |                     |                         |                          |                     |                          |
|---------------------------|-----------------------------------------------------------------------------------------------------------------------------------------------------------------------------------------------------------------------------------------------------------------------------------------------------------------------------------------------------------------------------------------------------------------------------------------------------------------------------------------------------------------------------------------------------------------------------------------------------------------------------------------------------------------------------------------------------------------------------------------------------------------------------------------------------------------------------------------------------------------------------------------------------------------------------------------------------------------------|-----------------------------|---------------------------|-----------------------------|---------------------|-------------------------|--------------------------|---------------------|--------------------------|
| Barton et al. (2015)      | No effects on the SE change score due to intervention type, school location or interaction of both (all $p > 0.05$ ). Pre-intervention SE score affected SE score change ( $F[1,77] = 25.09$ ; $p < .01$ ).                                                                                                                                                                                                                                                                                                                                                                                                                                                                                                                                                                                                                                                                                                                                                           |                             |                           |                             |                     |                         |                          |                     |                          |
|                           | <i>SE change scores</i>                                                                                                                                                                                                                                                                                                                                                                                                                                                                                                                                                                                                                                                                                                                                                                                                                                                                                                                                               |                             |                           |                             |                     |                         |                          |                     |                          |
|                           | <table><tr><th></th><th>Nature-based orienteering</th><th>Playground sports equipment</th></tr><tr><td><i>Urban school</i></td><td>2.16 ± 5.81 [0.68–5.16]</td><td>2.33 ± 6.69 [-0.65–3.66]</td></tr><tr><td><i>Rural school</i></td><td>0.59 ± 3.33 [-0.97-3.19]</td><td>0.78 ± 5.18 [-1.68-2.46]</td></tr></table>                                                                                                                                                                                                                                                                                                                                                                                                                                                                                                                                                                                                                                                  |                             | Nature-based orienteering | Playground sports equipment | <i>Urban school</i> | 2.16 ± 5.81 [0.68–5.16] | 2.33 ± 6.69 [-0.65–3.66] | <i>Rural school</i> | 0.59 ± 3.33 [-0.97-3.19] |
|                           | Nature-based orienteering                                                                                                                                                                                                                                                                                                                                                                                                                                                                                                                                                                                                                                                                                                                                                                                                                                                                                                                                             | Playground sports equipment |                           |                             |                     |                         |                          |                     |                          |
| <i>Urban school</i>       | 2.16 ± 5.81 [0.68–5.16]                                                                                                                                                                                                                                                                                                                                                                                                                                                                                                                                                                                                                                                                                                                                                                                                                                                                                                                                               | 2.33 ± 6.69 [-0.65–3.66]    |                           |                             |                     |                         |                          |                     |                          |
| <i>Rural school</i>       | 0.59 ± 3.33 [-0.97-3.19]                                                                                                                                                                                                                                                                                                                                                                                                                                                                                                                                                                                                                                                                                                                                                                                                                                                                                                                                              | 0.78 ± 5.18 [-1.68-2.46]    |                           |                             |                     |                         |                          |                     |                          |
| Duncan et al. (2014)      | No interaction effects (condition X time) or main effects (all $p > 0.05$ ) for diastolic BP. For systolic BP, no significant interaction or main effects immediately post-exercise ( $p > .05$ ). Significant condition X time interaction for systolic BP 15 minutes post-exercise ( $F [2,26] = 3.49$ , $p = 0.04$ , $\eta^2 = 0.212$ ) with systolic BP significantly lower after green exercise. No significant condition X time interaction for heart rate, no main effect for condition (both $p > .05$ ). Significant main effect with HR being higher immediately and 15-min. post-exercise ( $F [2,26] = 47.19$ , $p < .01$ , $\eta^2 = 0.784$ ). Significant mood scale X time ( $F [2,12] = 48.6$ , $p < .01$ , Wilks' Lambda = 0.11, $\eta^2 = 0.89$ ). Post-exercise, significantly higher fatigue scores and significantly lower vigor scores (Bonferroni corrected $p = 0.001$ ). Scores for tension were not significantly different ( $p > 0.05$ ). |                             |                           |                             |                     |                         |                          |                     |                          |
|                           | <table><tr><th></th><th>Green exercise</th><th>Control condition</th></tr></table>                                                                                                                                                                                                                                                                                                                                                                                                                                                                                                                                                                                                                                                                                                                                                                                                                                                                                    |                             | Green exercise            | Control condition           |                     |                         |                          |                     |                          |
|                           |                                                                                                                                                                                                                                                                                                                                                                                                                                                                                                                                                                                                                                                                                                                                                                                                                                                                                                                                                                       | Green exercise              | Control condition         |                             |                     |                         |                          |                     |                          |
|                           | <i>Diastolic BP (mm Hg)</i>                                                                                                                                                                                                                                                                                                                                                                                                                                                                                                                                                                                                                                                                                                                                                                                                                                                                                                                                           |                             |                           |                             |                     |                         |                          |                     |                          |
|                           | <i>Pre</i>                                                                                                                                                                                                                                                                                                                                                                                                                                                                                                                                                                                                                                                                                                                                                                                                                                                                                                                                                            | m=69.5 [64.2-74.8]          | m=64.7 [60.4-68.9]        |                             |                     |                         |                          |                     |                          |
|                           | <i>Immediately post</i>                                                                                                                                                                                                                                                                                                                                                                                                                                                                                                                                                                                                                                                                                                                                                                                                                                                                                                                                               | m=68.4 [61-75.8]            | m=70.6 [62.9-78.2]        |                             |                     |                         |                          |                     |                          |
|                           | <i>15 minutes post</i>                                                                                                                                                                                                                                                                                                                                                                                                                                                                                                                                                                                                                                                                                                                                                                                                                                                                                                                                                | m=66.6 [62.6-70.5]          | m=64.4 [58.8-68.3]        |                             |                     |                         |                          |                     |                          |
|                           | <i>Systolic BP (mm Hg)</i>                                                                                                                                                                                                                                                                                                                                                                                                                                                                                                                                                                                                                                                                                                                                                                                                                                                                                                                                            |                             |                           |                             |                     |                         |                          |                     |                          |
|                           | <i>Pre</i>                                                                                                                                                                                                                                                                                                                                                                                                                                                                                                                                                                                                                                                                                                                                                                                                                                                                                                                                                            | m=103.9 [99.5-108.2]        | m=102.2 [98.4-105.9]      |                             |                     |                         |                          |                     |                          |
|                           | <i>Immediately post</i>                                                                                                                                                                                                                                                                                                                                                                                                                                                                                                                                                                                                                                                                                                                                                                                                                                                                                                                                               | m=111.2 [108.1-117.3]       | m=112.7 [103-121.4]       |                             |                     |                         |                          |                     |                          |
|                           | <i>15 minutes post</i>                                                                                                                                                                                                                                                                                                                                                                                                                                                                                                                                                                                                                                                                                                                                                                                                                                                                                                                                                | m=97.2 [93.9-100.4]         | m=102.7 [99.1-108.6]      |                             |                     |                         |                          |                     |                          |
|                           | <i>Heart rate (bpm)</i>                                                                                                                                                                                                                                                                                                                                                                                                                                                                                                                                                                                                                                                                                                                                                                                                                                                                                                                                               |                             |                           |                             |                     |                         |                          |                     |                          |
| <i>Pre</i>                | m=81 [76-84]                                                                                                                                                                                                                                                                                                                                                                                                                                                                                                                                                                                                                                                                                                                                                                                                                                                                                                                                                          | m=83 [76-89]                |                           |                             |                     |                         |                          |                     |                          |
| <i>Immediately post</i>   | m=102 [95-108]                                                                                                                                                                                                                                                                                                                                                                                                                                                                                                                                                                                                                                                                                                                                                                                                                                                                                                                                                        | m=106 [101-109]             |                           |                             |                     |                         |                          |                     |                          |
| <i>15 minutes post</i>    | m=93 [89-97]                                                                                                                                                                                                                                                                                                                                                                                                                                                                                                                                                                                                                                                                                                                                                                                                                                                                                                                                                          | m=94 [86-101]               |                           |                             |                     |                         |                          |                     |                          |
| <i>Mood state</i>         |                                                                                                                                                                                                                                                                                                                                                                                                                                                                                                                                                                                                                                                                                                                                                                                                                                                                                                                                                                       |                             |                           |                             |                     |                         |                          |                     |                          |
| <i>Fatigue pre</i>        | m=39.3 [39-42]                                                                                                                                                                                                                                                                                                                                                                                                                                                                                                                                                                                                                                                                                                                                                                                                                                                                                                                                                        | m=39.8 [37.8-42.2]          |                           |                             |                     |                         |                          |                     |                          |
| <i>Fatigue post</i>       | m=45.3 [43.5-49.2]                                                                                                                                                                                                                                                                                                                                                                                                                                                                                                                                                                                                                                                                                                                                                                                                                                                                                                                                                    | m=47 [44.5-50]              |                           |                             |                     |                         |                          |                     |                          |
| <i>Vigor pre</i>          | m=52.1 [49-55]                                                                                                                                                                                                                                                                                                                                                                                                                                                                                                                                                                                                                                                                                                                                                                                                                                                                                                                                                        | m=51.5 [48.6-54.6]          |                           |                             |                     |                         |                          |                     |                          |
| <i>Vigor post</i>         | m=45 [42.1-49]                                                                                                                                                                                                                                                                                                                                                                                                                                                                                                                                                                                                                                                                                                                                                                                                                                                                                                                                                        | m=44.4 [40.6-48.6]          |                           |                             |                     |                         |                          |                     |                          |
| <i>Tension pre</i>        | m=45.8 [43.1-48]                                                                                                                                                                                                                                                                                                                                                                                                                                                                                                                                                                                                                                                                                                                                                                                                                                                                                                                                                      | m=45 [42.9-47]              |                           |                             |                     |                         |                          |                     |                          |
| <i>Tension post</i>       | m=44.4 [42.9-46.3]                                                                                                                                                                                                                                                                                                                                                                                                                                                                                                                                                                                                                                                                                                                                                                                                                                                                                                                                                    | m=44.5 [43-45.6]            |                           |                             |                     |                         |                          |                     |                          |
| Faber Taylor & Kuo (2009) | DSB performance dependent on setting ( $F [2,16] = 4.72$ , $p < .05$ ). No significant DSB performance differences between neighborhood and downtown settings ( $p > .05$ ). DSB scores better after park walk (Fisher's PLSD $d = .71$ , $p < .01$ ), and downtown walk (Fisher's PLSD $d = .59$ , $p < .05$ ). Park setting significantly higher on fun ( $t [13] = 2.39$ , $p < .05$ ). No other significant rating differences (all $p > .05$ ).                                                                                                                                                                                                                                                                                                                                                                                                                                                                                                                  |                             |                           |                             |                     |                         |                          |                     |                          |
|                           | <i>DSB performance mean scores after walk in each setting</i>                                                                                                                                                                                                                                                                                                                                                                                                                                                                                                                                                                                                                                                                                                                                                                                                                                                                                                         |                             |                           |                             |                     |                         |                          |                     |                          |
|                           | <table><tr><td><i>Neighborhood</i></td><td>m=3.71 ± 1.21</td></tr><tr><td><i>Downtown</i></td><td>m=3.82 ± 1.07</td></tr><tr><td><i>Park</i></td><td>m=4.41 ± 1.18</td></tr></table>                                                                                                                                                                                                                                                                                                                                                                                                                                                                                                                                                                                                                                                                                                                                                                                  | <i>Neighborhood</i>         | m=3.71 ± 1.21             | <i>Downtown</i>             | m=3.82 ± 1.07       | <i>Park</i>             | m=4.41 ± 1.18            |                     |                          |
| <i>Neighborhood</i>       | m=3.71 ± 1.21                                                                                                                                                                                                                                                                                                                                                                                                                                                                                                                                                                                                                                                                                                                                                                                                                                                                                                                                                         |                             |                           |                             |                     |                         |                          |                     |                          |
| <i>Downtown</i>           | m=3.82 ± 1.07                                                                                                                                                                                                                                                                                                                                                                                                                                                                                                                                                                                                                                                                                                                                                                                                                                                                                                                                                         |                             |                           |                             |                     |                         |                          |                     |                          |
| <i>Park</i>               | m=4.41 ± 1.18                                                                                                                                                                                                                                                                                                                                                                                                                                                                                                                                                                                                                                                                                                                                                                                                                                                                                                                                                         |                             |                           |                             |                     |                         |                          |                     |                          |
| Flynn et al. (2017)       | A request was sent out to the other for the exact test statistics, but no reply was obtained. No significant differences for PA self-efficacy and enjoyment. At follow-up, children reported increased frequency of someone having performed a physical activity or played a sport with them (median score, 2; range, 2–3) and that someone had provided transportation to a place where they could do physical activities or sports (median score, 2; range, 1–3).                                                                                                                                                                                                                                                                                                                                                                                                                                                                                                   |                             |                           |                             |                     |                         |                          |                     |                          |

|                                                           |                                                                                                                                                                                                                                                                                                                                                                                                                                                                                                                                                                                                                                                                                                                     |                                     |                                       |
|-----------------------------------------------------------|---------------------------------------------------------------------------------------------------------------------------------------------------------------------------------------------------------------------------------------------------------------------------------------------------------------------------------------------------------------------------------------------------------------------------------------------------------------------------------------------------------------------------------------------------------------------------------------------------------------------------------------------------------------------------------------------------------------------|-------------------------------------|---------------------------------------|
| Gopinath , Baur et al.;<br>Gopinath , Hardy et al. (2011) | No significant differences between the tertile groups of indoor and outdoor PA for retinal arteriolar and venular diameter and systolic and diastolic BP.<br>Linear associations between BP and outdoor and indoor PA: No significant effect of outdoor PA on any BP measures (systolic / diastolic / mean arterial BP). Significant effect of indoor PA on diastolic BP and mean arterial BP.                                                                                                                                                                                                                                                                                                                      |                                     |                                       |
|                                                           | <b>Outdoor PA</b>                                                                                                                                                                                                                                                                                                                                                                                                                                                                                                                                                                                                                                                                                                   |                                     | <b>Indoor PA</b>                      |
|                                                           | <i>Retinal arteriolar caliber (<math>\mu\text{m}</math>)</i>                                                                                                                                                                                                                                                                                                                                                                                                                                                                                                                                                                                                                                                        |                                     |                                       |
|                                                           | Low tertile                                                                                                                                                                                                                                                                                                                                                                                                                                                                                                                                                                                                                                                                                                         | m=162.5 [160.9-164.1]               | m=163.3 [161.6-164.9]                 |
|                                                           | Moderate tertile                                                                                                                                                                                                                                                                                                                                                                                                                                                                                                                                                                                                                                                                                                    | m=163.0 [161.0-165.1]               | m=164.7 [162.0-167.4]                 |
|                                                           | High tertile                                                                                                                                                                                                                                                                                                                                                                                                                                                                                                                                                                                                                                                                                                        | m=164.7 [163-166.5]                 | m=162.4 [161.0-163.8]                 |
|                                                           | <i>Retinal venular caliber (<math>\mu\text{m}</math>)</i>                                                                                                                                                                                                                                                                                                                                                                                                                                                                                                                                                                                                                                                           |                                     |                                       |
| Gopinath et al. (2012)                                    | Low tertile                                                                                                                                                                                                                                                                                                                                                                                                                                                                                                                                                                                                                                                                                                         | m=229.7 [227.2-230.8]               | m=229.0 [227.2-230.8]                 |
|                                                           | Moderate tertile                                                                                                                                                                                                                                                                                                                                                                                                                                                                                                                                                                                                                                                                                                    | m=228.8 [226.6-231.1]               | m=228.8 [226.6-231.1]                 |
|                                                           | High tertile                                                                                                                                                                                                                                                                                                                                                                                                                                                                                                                                                                                                                                                                                                        | m=229.3 [226.3-230.4]               | m=228.2 [226.2-230.2]                 |
|                                                           | <i>Systolic BP (mm Hg)</i>                                                                                                                                                                                                                                                                                                                                                                                                                                                                                                                                                                                                                                                                                          |                                     |                                       |
|                                                           | Low tertile                                                                                                                                                                                                                                                                                                                                                                                                                                                                                                                                                                                                                                                                                                         | m=100.8 [99.1-102.4]                | m=101.2 [99.6-102.8]                  |
|                                                           | Moderate tertile                                                                                                                                                                                                                                                                                                                                                                                                                                                                                                                                                                                                                                                                                                    | m=100.8 [99.4-102.3]                | m=100.8 [99.5-102.1]                  |
|                                                           | High tertile                                                                                                                                                                                                                                                                                                                                                                                                                                                                                                                                                                                                                                                                                                        | m=100.9 [99.4-102.5]                | m=99.9 [98.3-101.5]                   |
|                                                           | <i>Diastolic BP (mm Hg)</i>                                                                                                                                                                                                                                                                                                                                                                                                                                                                                                                                                                                                                                                                                         |                                     |                                       |
|                                                           | Low tertile                                                                                                                                                                                                                                                                                                                                                                                                                                                                                                                                                                                                                                                                                                         | m=63.0 [60.8-65.2]                  | m=62.6 [60.7-64.5]                    |
|                                                           | Moderate tertile                                                                                                                                                                                                                                                                                                                                                                                                                                                                                                                                                                                                                                                                                                    | m=62.9 [61.1-64.6]                  | m=62.4 [60.2-64.5]                    |
|                                                           | High tertile                                                                                                                                                                                                                                                                                                                                                                                                                                                                                                                                                                                                                                                                                                        | m=61.5 [59.5-65.5]                  | m=62.0 [60.2-63.9]                    |
|                                                           | <i>Multiple Regression on BP outcomes (mm Hg)</i>                                                                                                                                                                                                                                                                                                                                                                                                                                                                                                                                                                                                                                                                   |                                     |                                       |
|                                                           | Systolic BP                                                                                                                                                                                                                                                                                                                                                                                                                                                                                                                                                                                                                                                                                                         | $\beta = .38$ (SE: .34), $p > .05$  | $\beta = -1.76$ (SE: 1.26), $p > .05$ |
|                                                           | Diastolic BP                                                                                                                                                                                                                                                                                                                                                                                                                                                                                                                                                                                                                                                                                                        | $\beta = -.80$ (SE: .42), $p > .05$ | $\beta = -2.35$ (SE: .73), $p < .01$  |
|                                                           | Mean arterial BP                                                                                                                                                                                                                                                                                                                                                                                                                                                                                                                                                                                                                                                                                                    | $\beta = -.41$ (SE: .33), $p > .05$ | $\beta = -2.15$ (SE: .75), $p < .01$  |
|                                                           | For indoor PA, the moderate- and high-PA tertiles were only presented summarized.<br>Higher QoL total score, physical, psychosocial, emotional, social and school scores in low tertiles of indoor PA compared to low tertiles of outdoor PA<br>Higher QoL total score, physical, psychosocial, emotional, social and school scores in high tertiles of outdoor PA compared to moderate-high tertiles of indoor PA<br><br><i>Note: The CIs were not presented in the original study but calculated by the authors of this review to allow for comparisons between outdoor and indoor PA in terms of health-related life quality. Mean differences were considered as significant when CIs were not overlapping.</i> |                                     |                                       |
|                                                           | <b>Outdoor PA</b>                                                                                                                                                                                                                                                                                                                                                                                                                                                                                                                                                                                                                                                                                                   |                                     | <b>Indoor PA</b>                      |
|                                                           | <i>Quality of life total score</i>                                                                                                                                                                                                                                                                                                                                                                                                                                                                                                                                                                                                                                                                                  |                                     |                                       |
|                                                           | Low tertile cross-sectional (CS)                                                                                                                                                                                                                                                                                                                                                                                                                                                                                                                                                                                                                                                                                    | m=79.65 [79.54-79.76]               | m=80.23 [80.77-80.89]                 |
|                                                           | Moderate tertile CS                                                                                                                                                                                                                                                                                                                                                                                                                                                                                                                                                                                                                                                                                                 | m=79.84 [79.71-79.97]               | m=79.40 [79.28-79.52]                 |
|                                                           | High tertile CS                                                                                                                                                                                                                                                                                                                                                                                                                                                                                                                                                                                                                                                                                                     | m=81.84 [81.73-81.95]               |                                       |
|                                                           | Low tertile longitudinal (LT)                                                                                                                                                                                                                                                                                                                                                                                                                                                                                                                                                                                                                                                                                       | m=78.68 [78.25-79.11]               | m=80.75 [80.10-81.40]                 |
|                                                           | Moderate tertile LT                                                                                                                                                                                                                                                                                                                                                                                                                                                                                                                                                                                                                                                                                                 | m=79.30 [78.83-79.77]               | m=79.66 [79.17-80.15]                 |
|                                                           | High tertile LT                                                                                                                                                                                                                                                                                                                                                                                                                                                                                                                                                                                                                                                                                                     | m=83.12 [82.75-83.49]               |                                       |
|                                                           | <i>Physical score</i>                                                                                                                                                                                                                                                                                                                                                                                                                                                                                                                                                                                                                                                                                               |                                     |                                       |
|                                                           | Low tertile CS                                                                                                                                                                                                                                                                                                                                                                                                                                                                                                                                                                                                                                                                                                      | m=89.23 [89.11-89.35]               | m=90.60 [90.62-90.76]                 |
|                                                           | Moderate tertile CS                                                                                                                                                                                                                                                                                                                                                                                                                                                                                                                                                                                                                                                                                                 | m=89.61 [89.47-89.75]               | m=90.33 [90.19-90.47]                 |
|                                                           | High tertile CS                                                                                                                                                                                                                                                                                                                                                                                                                                                                                                                                                                                                                                                                                                     | m=92.72 [92.59-92.85]               |                                       |
|                                                           | Low tertile LT                                                                                                                                                                                                                                                                                                                                                                                                                                                                                                                                                                                                                                                                                                      | m=89.03 [88.60-89.46]               | m=94.35 [93.62-95.08]                 |
|                                                           | Moderate tertile LT                                                                                                                                                                                                                                                                                                                                                                                                                                                                                                                                                                                                                                                                                                 | m=89.11 [88.64-89.58]               | m=93.35 [92.80-93.90]                 |
|                                                           | High tertile LT                                                                                                                                                                                                                                                                                                                                                                                                                                                                                                                                                                                                                                                                                                     | m=95.11 [94.74-95.48]               |                                       |
|                                                           | <i>Psychosocial score</i>                                                                                                                                                                                                                                                                                                                                                                                                                                                                                                                                                                                                                                                                                           |                                     |                                       |
|                                                           | Low tertile CS                                                                                                                                                                                                                                                                                                                                                                                                                                                                                                                                                                                                                                                                                                      | m=75.00 [74.87-75.13]               | m=76.07 [76.00-76.14]                 |
|                                                           | Moderate tertile CS                                                                                                                                                                                                                                                                                                                                                                                                                                                                                                                                                                                                                                                                                                 | m=75.04 [74.89-75.19]               | m=74.05 [73.90-74.20]                 |

|                       |                                                                                                                                                                                                                                                                                                                                                                                                                                                                                                                                                                                                                                 |                                                       |                                                      |
|-----------------------|---------------------------------------------------------------------------------------------------------------------------------------------------------------------------------------------------------------------------------------------------------------------------------------------------------------------------------------------------------------------------------------------------------------------------------------------------------------------------------------------------------------------------------------------------------------------------------------------------------------------------------|-------------------------------------------------------|------------------------------------------------------|
|                       | <i>High tertile CS</i>                                                                                                                                                                                                                                                                                                                                                                                                                                                                                                                                                                                                          | m=76.56 [76.42-76.70]                                 |                                                      |
|                       | <i>Low tertile LT</i>                                                                                                                                                                                                                                                                                                                                                                                                                                                                                                                                                                                                           | m=89.03 [88.60-89.46]                                 | m=73.97 [73.16-74.78]                                |
|                       | <i>Moderate tertile LT</i>                                                                                                                                                                                                                                                                                                                                                                                                                                                                                                                                                                                                      | m=89.11 [88.64-89.58]                                 |                                                      |
|                       | <i>High tertile LT</i>                                                                                                                                                                                                                                                                                                                                                                                                                                                                                                                                                                                                          | m=95.11 [94.74-95.48]                                 | m=72.91 [72.67-73.15]                                |
|                       | <i>Emotional score</i>                                                                                                                                                                                                                                                                                                                                                                                                                                                                                                                                                                                                          |                                                       |                                                      |
|                       | <i>Low tertile CS</i>                                                                                                                                                                                                                                                                                                                                                                                                                                                                                                                                                                                                           | m=72.65 [72.48-72.82]                                 | m=73.75 [73.65-73.85]                                |
|                       | <i>Moderate tertile CS</i>                                                                                                                                                                                                                                                                                                                                                                                                                                                                                                                                                                                                      | m=72.40 [72.21-72.59]                                 | m=71.06 [70.87-71.25]                                |
|                       | <i>High tertile CS</i>                                                                                                                                                                                                                                                                                                                                                                                                                                                                                                                                                                                                          | m=73.97 [73.80-74.14]                                 |                                                      |
|                       | <i>Low tertile LT</i>                                                                                                                                                                                                                                                                                                                                                                                                                                                                                                                                                                                                           | m=70.16 [69.46-70.86]                                 | m=69.46 [68.36-70.56]                                |
|                       | <i>Moderate tertile LT</i>                                                                                                                                                                                                                                                                                                                                                                                                                                                                                                                                                                                                      | m=69.61 [68.85-70.37]                                 |                                                      |
|                       | <i>High tertile LT</i>                                                                                                                                                                                                                                                                                                                                                                                                                                                                                                                                                                                                          | m=73.47 [72.87-74.07]                                 | m=68.00 [67.19-68.81]                                |
|                       | <i>Social score</i>                                                                                                                                                                                                                                                                                                                                                                                                                                                                                                                                                                                                             |                                                       |                                                      |
|                       | <i>Low tertile CS</i>                                                                                                                                                                                                                                                                                                                                                                                                                                                                                                                                                                                                           | m=89.05 [88.92-89.18]                                 | m=90.84 [90.77-90.91]                                |
|                       | <i>Moderate tertile CS</i>                                                                                                                                                                                                                                                                                                                                                                                                                                                                                                                                                                                                      | m=88.67 [88.52-88.82]                                 | m=88.63 [88.48-88.78]                                |
|                       | <i>High tertile CS</i>                                                                                                                                                                                                                                                                                                                                                                                                                                                                                                                                                                                                          | m=92.62 [92.48-92.76]                                 |                                                      |
|                       | <i>Low tertile LT</i>                                                                                                                                                                                                                                                                                                                                                                                                                                                                                                                                                                                                           | m=88.21 [87.74-88.68]                                 | m=89.98 [89.17-90.79]                                |
|                       | <i>Moderate tertile LT</i>                                                                                                                                                                                                                                                                                                                                                                                                                                                                                                                                                                                                      | m=90.08 [89.57-90.59]                                 |                                                      |
|                       | <i>High tertile LT</i>                                                                                                                                                                                                                                                                                                                                                                                                                                                                                                                                                                                                          | m=93.54 [93.14-93.94]                                 | m=89.43 [88.82-90.04]                                |
|                       | <i>School score</i>                                                                                                                                                                                                                                                                                                                                                                                                                                                                                                                                                                                                             |                                                       |                                                      |
|                       | <i>Low tertile CS</i>                                                                                                                                                                                                                                                                                                                                                                                                                                                                                                                                                                                                           | m=64.11 [63.92-64.30]                                 | m=64.41 [64.30-64.52]                                |
|                       | <i>Moderate tertile CS</i>                                                                                                                                                                                                                                                                                                                                                                                                                                                                                                                                                                                                      | m=64.99 [64.78-65.20]                                 | m=63.56 [63.35-63.77]                                |
|                       | <i>High tertile CS</i>                                                                                                                                                                                                                                                                                                                                                                                                                                                                                                                                                                                                          | m=64.03 [63.83-64.23]                                 |                                                      |
|                       | <i>Low tertile LT</i>                                                                                                                                                                                                                                                                                                                                                                                                                                                                                                                                                                                                           | m=63.30 [62.54-64.06]                                 | m=63.32 [62.14-64.50]                                |
|                       | <i>Moderate tertile LT</i>                                                                                                                                                                                                                                                                                                                                                                                                                                                                                                                                                                                                      | m=65.16 [64.33-65.99]                                 |                                                      |
|                       | <i>High tertile LT</i>                                                                                                                                                                                                                                                                                                                                                                                                                                                                                                                                                                                                          | m=65.64 [65.01-66.27]                                 | m=63.00 [62.13-63.87]                                |
| Hammond et al. (2011) | No significant correlations neither between outdoor organized activities / sports and health problems or indoor organized activities / sports (all $p > .05$ )                                                                                                                                                                                                                                                                                                                                                                                                                                                                  |                                                       |                                                      |
|                       |                                                                                                                                                                                                                                                                                                                                                                                                                                                                                                                                                                                                                                 | <b>Outdoor organized activities / sports</b>          | <b>Indoor organized activities / sports</b>          |
|                       | <i>Body pain / discomfort</i>                                                                                                                                                                                                                                                                                                                                                                                                                                                                                                                                                                                                   | $r=.05, p>.05$                                        | $r= -.05, p>.05$                                     |
|                       | <i>Trouble sleeping</i>                                                                                                                                                                                                                                                                                                                                                                                                                                                                                                                                                                                                         | $r= -.13, p>.05$                                      | $r= -.01, p>.05$                                     |
|                       | <i>Repeated upset stomach</i>                                                                                                                                                                                                                                                                                                                                                                                                                                                                                                                                                                                                   | $r= -.04, p>.05$                                      | $r= -.04, p>.05$                                     |
| Liu et al. (2015)     | Children who took part in outdoor PA had higher proportion of good self-reported health than those without. For females, only significant health differences between frequent and infrequent outdoor PA at age 12. Participation in outdoor PA at both ages 6 and 12 years is associated with a higher likelihood of good self-reported health (OR= 1.27[1.08, 1.50]) compared with those who did not like or participate in this at only one or at neither age. OR 1.47[1.14-1.89] for persistent outdoor participation in boys, no significant different likelihood for persistent outdoor PA in girls (OR= 1.14 [.92-1.42]). |                                                       |                                                      |
|                       |                                                                                                                                                                                                                                                                                                                                                                                                                                                                                                                                                                                                                                 | <i>Good self-reported health</i>                      |                                                      |
|                       |                                                                                                                                                                                                                                                                                                                                                                                                                                                                                                                                                                                                                                 | <b>Frequent outdoor PA</b>                            | <b>Infrequent outdoor PA</b>                         |
|                       | <i>Males 6 years</i>                                                                                                                                                                                                                                                                                                                                                                                                                                                                                                                                                                                                            | 85.5%                                                 | 79.7% $p<.01$                                        |
|                       | <i>Males 12 years</i>                                                                                                                                                                                                                                                                                                                                                                                                                                                                                                                                                                                                           | 86.5%                                                 | 81.5% $p<.01$                                        |
|                       | <i>Females 6 years</i>                                                                                                                                                                                                                                                                                                                                                                                                                                                                                                                                                                                                          | 81.0%                                                 | 80.5% $p>.05$                                        |
|                       | <i>Females 12 years</i>                                                                                                                                                                                                                                                                                                                                                                                                                                                                                                                                                                                                         | 82.5%                                                 | 78.7% $p<.05$                                        |
|                       | <i>Both ages</i>                                                                                                                                                                                                                                                                                                                                                                                                                                                                                                                                                                                                                | 82.3%                                                 | 79.1% $p<.05$                                        |
| Parsons et al. (2018) | No associations between napping, nighttime sleep duration and total sleep with PA time indoors or outdoors.                                                                                                                                                                                                                                                                                                                                                                                                                                                                                                                     |                                                       |                                                      |
|                       |                                                                                                                                                                                                                                                                                                                                                                                                                                                                                                                                                                                                                                 | <b>Outdoor PA</b>                                     | <b>Indoor PA</b>                                     |
|                       | <i>Nighttime sleep (hours)</i>                                                                                                                                                                                                                                                                                                                                                                                                                                                                                                                                                                                                  | $m=9.69 \pm .97$<br>$\beta=.02$ (SE=.04), $p>.05$     | $m=9.69 \pm .97$<br>$\beta=.07$ (SE=.05), $p<.05$    |
|                       | <i>Nighttime and nap sleep (hours)</i>                                                                                                                                                                                                                                                                                                                                                                                                                                                                                                                                                                                          | $m=11.20 \pm 1.03$<br>$\beta= -.01$ (SE=.06), $p>.05$ | $m=11.20 \pm 1.03$<br>$\beta= .10$ (SE=.06), $p>.05$ |
|                       | <i>Napped at center</i>                                                                                                                                                                                                                                                                                                                                                                                                                                                                                                                                                                                                         | OR 1.10 [.67-1.81]                                    | OR .88 [.61-.125]                                    |
|                       | <i>Bedtime after 9 pm</i>                                                                                                                                                                                                                                                                                                                                                                                                                                                                                                                                                                                                       | OR 1.06 [.9-1.26]                                     | OR .81 [.7-.94]                                      |

|                     |                                                                                                                                                                                                                                                                                                                                                                                                                                                                                                                                                                                                                                                                                                                   |                                                                         |                                                                         |
|---------------------|-------------------------------------------------------------------------------------------------------------------------------------------------------------------------------------------------------------------------------------------------------------------------------------------------------------------------------------------------------------------------------------------------------------------------------------------------------------------------------------------------------------------------------------------------------------------------------------------------------------------------------------------------------------------------------------------------------------------|-------------------------------------------------------------------------|-------------------------------------------------------------------------|
| Raney et al. (2019) | Condition X time interaction for antisocial behavior ( $F[2,998]=10.28$ , $p<0.01$ ) with physical and verbal conflict rates decreasing below pre-greening rates after 4 months at the experimental location. Significant decrease in minutes spent alone (mean difference= $-2.2$ [ $1.7-2.7$ ], $p<0.01$ ) and significant increase in the number of minutes spent in small groups (mean difference= $1.7$ [ $0.9-2.6$ ], $p<0.01$ ) at experimental location.                                                                                                                                                                                                                                                  |                                                                         |                                                                         |
|                     | <i>Number of antisocial interactions during 20 min. recess</i>                                                                                                                                                                                                                                                                                                                                                                                                                                                                                                                                                                                                                                                    |                                                                         |                                                                         |
|                     | <b>Greening location</b>                                                                                                                                                                                                                                                                                                                                                                                                                                                                                                                                                                                                                                                                                          | <b>Control location</b>                                                 |                                                                         |
|                     | <i>Pre-greening</i><br><i>Post-greening</i><br><i>4 month follow-up</i>                                                                                                                                                                                                                                                                                                                                                                                                                                                                                                                                                                                                                                           | $m=3.5$ [ $2.5-4.5$ ]<br>$m=4.6$ [ $3.0-6.2$ ]<br>$m=1.8$ [ $1.0-2.6$ ] | $m=3.6$ [ $3.2-4.0$ ]<br>$m=2.9$ [ $1.5-4.3$ ]<br>$m=3.2$ [ $2.6-3.8$ ] |
| Reed et al. (2013)  | There was a significant main effect for exercise on self-esteem ( $F[1,74]=12.2$ , $p<0.01$ ), but no main effect for exercise condition ( $F[1,74]=0.02$ , $p>0.05$ ) and no interaction ( $F[1,74] = 0.13$ , $p>0.05$ ). No significant differences between green and control exercise in terms of enjoyment ( $t[75] = 0.43$ , $p>0.05$ ), ratings of perceived exertion ( $t[75] = 0.11$ , $p>0.05$ ) or change in self-esteem ( $t[75] = 0.13$ , $p>0.05$ ).                                                                                                                                                                                                                                                 |                                                                         |                                                                         |
|                     | <b>Green Exercise</b>                                                                                                                                                                                                                                                                                                                                                                                                                                                                                                                                                                                                                                                                                             | <b>Control condition</b>                                                |                                                                         |
|                     | $\Delta$ Self-esteem                                                                                                                                                                                                                                                                                                                                                                                                                                                                                                                                                                                                                                                                                              | $.9 \pm 2.6$                                                            | $.5 \pm 4.2$ $p>0.05$                                                   |
|                     | Ratings of perceived exertion                                                                                                                                                                                                                                                                                                                                                                                                                                                                                                                                                                                                                                                                                     | $m=13.5 \pm 3.6$                                                        | $m=13.6 \pm 3.6$ $p>0.05$                                               |
| Wood et al. (2013)  | Enjoyment                                                                                                                                                                                                                                                                                                                                                                                                                                                                                                                                                                                                                                                                                                         | $m=89.2 \pm 31.4$                                                       | $m=83.6 \pm 34.7$ $p>0.05$                                              |
|                     | Significant main effect on SE due to PA ( $F[1]=6.10$ , $p<0.05$ ) but not due to the environmental viewing condition ( $p>0.05$ ). For mood, no significant effect of viewing different environmental conditions ( $p>0.05$ ). Main effect for mood changes and PA participation ( $F[6]=5.29$ , $p<0.01$ ). PA resulted in significant increase in fatigue ( $F[1]=8.11$ , Bonferroni corrected $p<0.0083$ ) and decrease in tension ( $F[1]=11.56$ , Bonferroni corrected $p<0.0083$ ). No other significant pre-post changes on other mood sub-scale (all $p > .0083$ ). No significant main effect for total mood disturbance due to participation in PA or environmental viewing condition (all $p>0.05$ ). |                                                                         |                                                                         |
|                     | <b>Green Exercise</b>                                                                                                                                                                                                                                                                                                                                                                                                                                                                                                                                                                                                                                                                                             | <b>Control condition</b>                                                |                                                                         |
|                     | <i>Tension pre</i>                                                                                                                                                                                                                                                                                                                                                                                                                                                                                                                                                                                                                                                                                                | $m=49.7 \pm 7.9$                                                        | $m=50.3 \pm 9.3$                                                        |
|                     | <i>Tension post</i>                                                                                                                                                                                                                                                                                                                                                                                                                                                                                                                                                                                                                                                                                               | $m=50.3 \pm 9.3$                                                        | $m=44.7 \pm 6.1$                                                        |
|                     | <i>Depression pre</i>                                                                                                                                                                                                                                                                                                                                                                                                                                                                                                                                                                                                                                                                                             | $m=45.8 \pm 4.0$                                                        | $m=45.0 \pm 3.2$                                                        |
|                     | <i>Depression post</i>                                                                                                                                                                                                                                                                                                                                                                                                                                                                                                                                                                                                                                                                                            | $m=45.9 \pm 4.3$                                                        | $m=45.3 \pm 3.7$                                                        |
|                     | <i>Anger pre</i>                                                                                                                                                                                                                                                                                                                                                                                                                                                                                                                                                                                                                                                                                                  | $m=46.6 \pm 6.1$                                                        | $m=46.7 \pm 5.6$                                                        |
|                     | <i>Anger post</i>                                                                                                                                                                                                                                                                                                                                                                                                                                                                                                                                                                                                                                                                                                 | $m=47.0 \pm 9.4$                                                        | $m=46.9 \pm 6.7$                                                        |
|                     | <i>Vigour pre</i>                                                                                                                                                                                                                                                                                                                                                                                                                                                                                                                                                                                                                                                                                                 | $m=53.4 \pm 9.1$                                                        | $m=50.3 \pm 8.7$                                                        |
|                     | <i>Vigour post</i>                                                                                                                                                                                                                                                                                                                                                                                                                                                                                                                                                                                                                                                                                                | $m=49.8 \pm 9.4$                                                        | $m=48.6 \pm 9.3$                                                        |
|                     | <i>Fatigue pre</i>                                                                                                                                                                                                                                                                                                                                                                                                                                                                                                                                                                                                                                                                                                | $m=47.6 \pm 10.1$                                                       | $m=46.6 \pm 9.5$                                                        |
|                     | <i>Fatigue post</i>                                                                                                                                                                                                                                                                                                                                                                                                                                                                                                                                                                                                                                                                                               | $m=52.4 \pm 9.5$                                                        | $m=52.6 \pm 10.2$                                                       |
|                     | <i>Confusion pre</i>                                                                                                                                                                                                                                                                                                                                                                                                                                                                                                                                                                                                                                                                                              | $m=46.9 \pm 5.6$                                                        | $m=46.4 \pm 5.5$                                                        |
|                     | <i>Confusion post</i>                                                                                                                                                                                                                                                                                                                                                                                                                                                                                                                                                                                                                                                                                             | $m=45.2 \pm 4.5$                                                        | $m=45.2 \pm 5.1$                                                        |
| Wood et al. (2014)  | No significant interaction for time X environmental condition for SE. No significant main effect due to the orienteering environment (all $p>0.05$ ). Significant time main effect for SE ( $F[1,49]= 5.24$ ; $p<0.05$ , $\eta_p=0.1$ ).                                                                                                                                                                                                                                                                                                                                                                                                                                                                          |                                                                         |                                                                         |
|                     | <i>Self-esteem scores</i>                                                                                                                                                                                                                                                                                                                                                                                                                                                                                                                                                                                                                                                                                         |                                                                         |                                                                         |
|                     | <b>Green Exercise</b>                                                                                                                                                                                                                                                                                                                                                                                                                                                                                                                                                                                                                                                                                             | <b>Control Condition</b>                                                |                                                                         |
|                     | <i>Pre</i>                                                                                                                                                                                                                                                                                                                                                                                                                                                                                                                                                                                                                                                                                                        | $m=31.5$ [ $30.2-32.3$ ]                                                | $m=31.4$ [ $30.1-32.1$ ]                                                |
|                     | <i>Post</i>                                                                                                                                                                                                                                                                                                                                                                                                                                                                                                                                                                                                                                                                                                       | $m=31.9$ [ $30.6-32.7$ ]                                                | $m=32.4$ [ $31.1-33.3$ ]                                                |
