# Supplementary material for: Psychosocial and Physiological Health Outcomes of Green Exercise in Children and Adolescents—A Systematic Review
Source: MDPI journal article supplement (doi:10.3390/ijerph16214266), 2019-11-02
Supplement: s1 [file s1]

## Supplementary file 2: Quality assessment with the EPHP tool

### Category and Global rating

| Study                                               | <i>Selection Bias</i> | <i>Study Design</i> | <i>Confounders</i> | <i>Blinding</i> | <i>Data Collection Methods</i> | <i>Withdrawal / Dropouts</i> | <b>Overall Rating</b> |
|-----------------------------------------------------|-----------------------|---------------------|--------------------|-----------------|--------------------------------|------------------------------|-----------------------|
| Barton et al. (2015)                                | 3                     | 2                   | 1                  | 3               | 3                              | 3                            | <b>3</b>              |
| Duncan et al. (2014)                                | 3                     | 1                   | 1                  | 3               | 1                              | 1                            | <b>3</b>              |
| Faber Taylor & Kuo (2009)                           | 3                     | 1                   | 1                  | 1               | 1                              | 2                            | <b>2</b>              |
| Flynn et al. (2017)                                 | 3                     | 2                   | 1                  | 3               | 2                              | 3                            | <b>3</b>              |
| Gopinath, Baur et al. / Gopinath, Hardy et al. 2011 | 2                     | 3                   | N/A                | N/A             | 3                              | 1                            | <b>3</b>              |
| Gopinath et al. (2012)                              | 2                     | 2                   | N/A                | N/A             | 3                              | 3                            | <b>3</b>              |
| Hammond et al. (2011)                               | 3                     | 3                   | N/A                | N/A             | 3                              | 1                            | <b>3</b>              |
| Liu et al. (2015)                                   | 2                     | 2                   | N/A                | N/A             | 3                              | 3                            | <b>3</b>              |
| Parsons et al. (2018)                               | 2                     | 3                   | N/A                | N/A             | 3                              | 1                            | <b>3</b>              |
| Raney et al. (2019)                                 | 3                     | 1                   | 3                  | 3               | 1                              | 3                            | <b>3</b>              |
| Reed et al. (2013)                                  | 3                     | 1                   | 1                  | 3               | 3                              | 1                            | <b>3</b>              |
| Wood et al. (2013)                                  | 3                     | 1                   | 1                  | 2               | 3                              | 1                            | <b>3</b>              |
| Wood & Smyth (2014)                                 | 3                     | 1                   | 1                  | 3               | 2                              | 3                            | <b>3</b>              |

## Intervention Integrity and Analyses

|                               | <i>Intervention Integrity</i>                      |                             |                                                                 | <i>Analyses</i>           |                         |                                        |                                                                               |
|-------------------------------|----------------------------------------------------|-----------------------------|-----------------------------------------------------------------|---------------------------|-------------------------|----------------------------------------|-------------------------------------------------------------------------------|
|                               | <i>% participants receiving allocated exposure</i> | <i>Consistency measured</i> | <i>Likely that subjects received an unintended intervention</i> | <i>Unit of allocation</i> | <i>Unit of analyses</i> | <i>Statistical methods appropriate</i> | <i>Analyses by allocation status rather than actual intervention received</i> |
| Barton et al. (2015)          | 80-100                                             | Can't tell                  | Can't tell                                                      | Individual                | Individual              | No                                     | No                                                                            |
| Duncan et al. (2014)          | 80-100                                             | Yes                         | Can't tell                                                      | Individual                | Individual              | No                                     | Yes                                                                           |
| Faber Taylor & Kuo (2009)     | 80-100                                             | Yes                         | Can't tell                                                      | Individual                | Individual              | Yes                                    | No                                                                            |
| Flynn et al. (2017)           | 80-100                                             | Yes                         | Can't tell                                                      | Individual                | Individual              | Yes                                    | No                                                                            |
| Gopinath, Baur et al. 2011    | N/A                                                |                             |                                                                 | Individual                | Individual              | No                                     | No                                                                            |
| Gopinath, Hardy et al. (2011) | N/A                                                |                             |                                                                 | Individual                | Individual              | No                                     | No                                                                            |
| Gopinath et al. (2012)        | N/A                                                |                             |                                                                 | Individual                | Individual              | No                                     | No                                                                            |
| Hammond et al. (2011)         | N/A                                                |                             |                                                                 | Individual                | Individual              | Yes                                    | N/A                                                                           |
| Liu et al. (2015)             | N/A                                                |                             |                                                                 | Individual                | Individual              | No                                     | No                                                                            |
| Parsons et al. (2018)         | N/A                                                |                             |                                                                 | Individual                | Individual              | No                                     | N/A                                                                           |
| Raney et al. (2019)           | 80-100                                             | Can't tell                  | Can't tell                                                      | Individual                | Individual              | No                                     | No                                                                            |
| Reed et al. (2013)            | 80-100                                             | Yes                         | Can't tell                                                      | Individual                | Individual              | Yes                                    | No                                                                            |
| Wood et al. (2013)            | 80-100                                             | Yes                         | Can't tell                                                      | Individual                | Individual              | No                                     | No                                                                            |
| Wood & Smyth (2014)           | 80-100                                             | Can't tell                  | Can't tell                                                      | Individual                | Individual              | No                                     | No                                                                            |
